# Supplementary material
Source: Springer Nature journal article supplement (https://www.springermedizin.de/resource/supplementary/12990_2009_231_MOESM3_ESM.pdf/9612846)

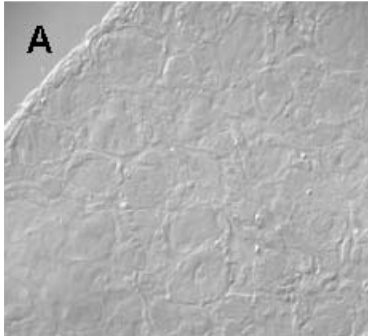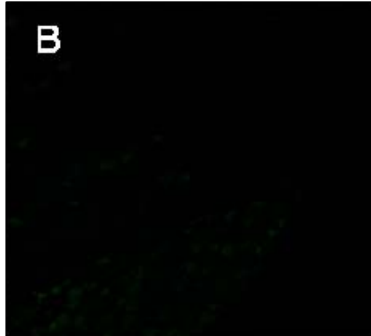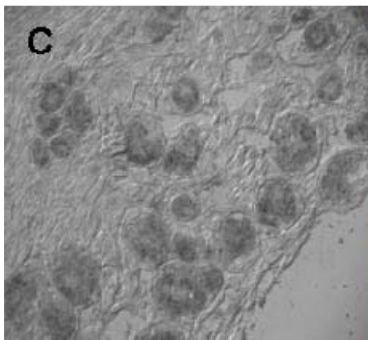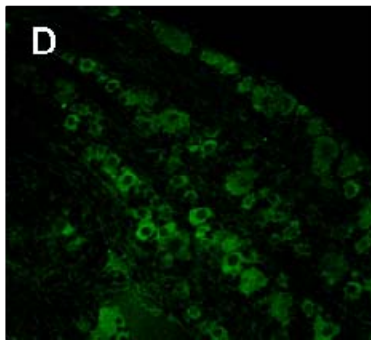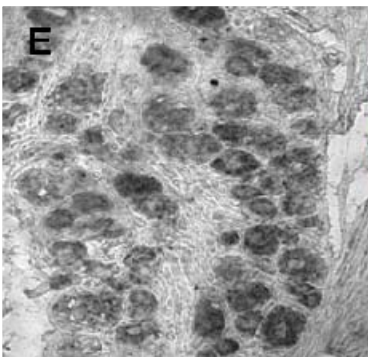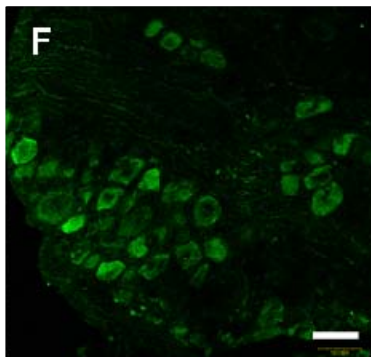

Supplement: MOESM3 [file 9612846]
